# Supplementary material for: Helicobacter pylori from Peptic Ulcer Patients in Uganda Is Highly Resistant to Clarithromycin and Fluoroquinolones: Results of the GenoType HelicoDR Test Directly Applied on Stool
Source: Hindawi journal article supplement (doi:10.1155/2017/5430723), 2017-01-01
Supplement: f1 [file 5430723.f1.zip]

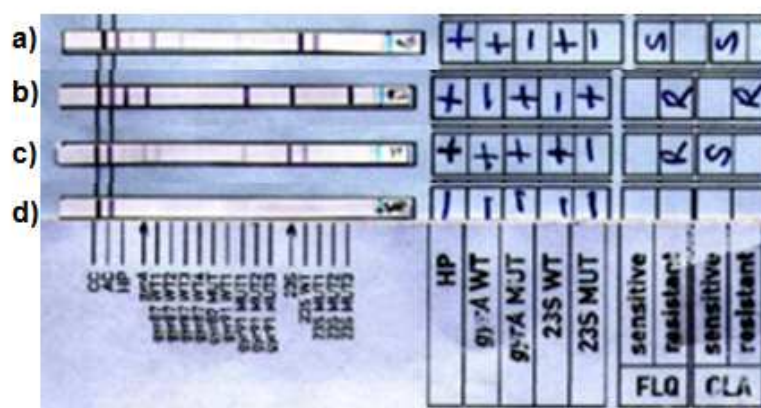

**Figure 3. Representative hybridisation results on the nitrocellulose strips obtained in our laboratory.**

a) *H. pylori* sensitive to both FQL and CLA, b) Resistant to both FLQ and CLA  
c) Resistant to FLQ and but sensitive to CLA, d) Negative control (PCR water)
